# Supplementary material
Source: PubMed Central journal article supplement (PMC3700564)
Supplement: NIHMS449678-supplement-01.pdf [file NIHMS449678-supplement-01.pdf]

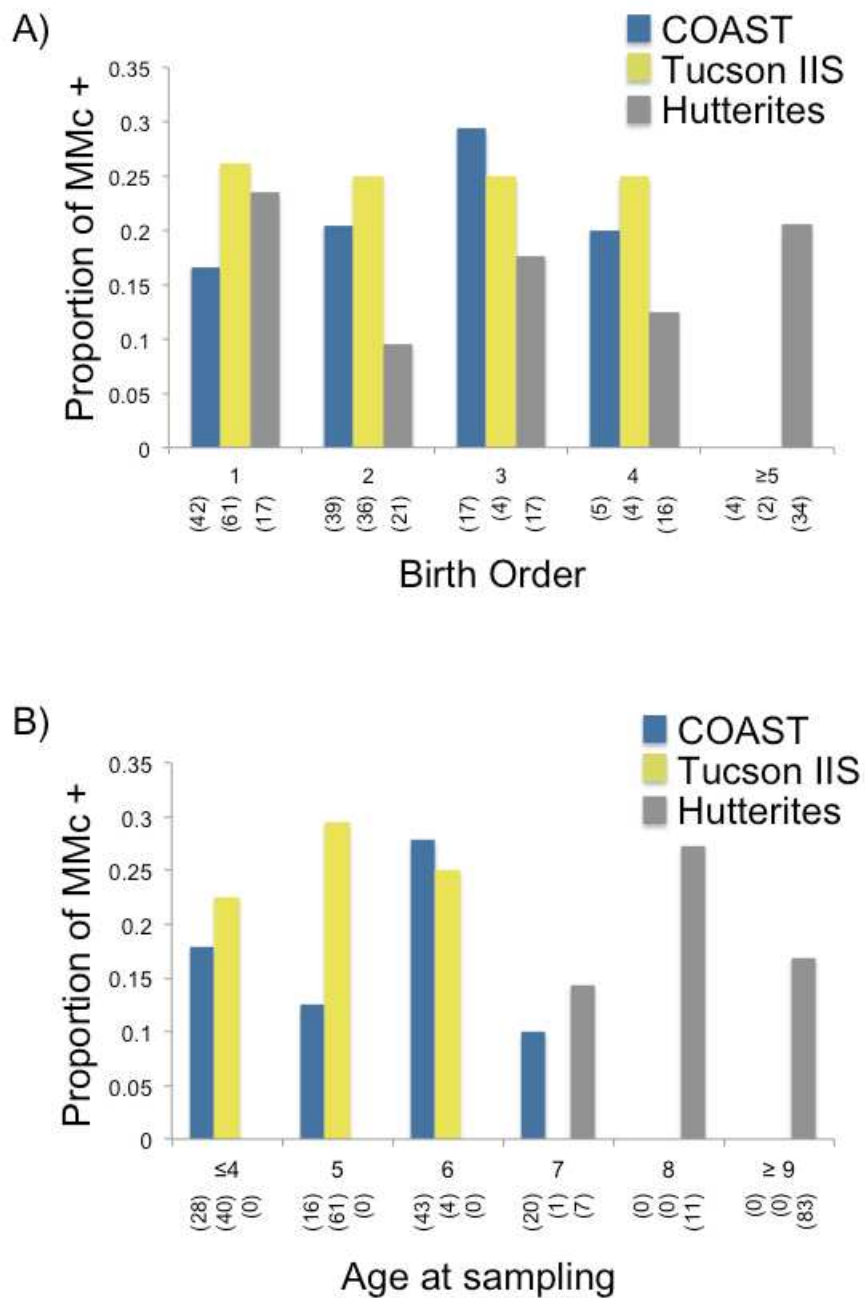

Supplemental Figure 1

Supplemental Figure 1. MMc rates by A) birth order and B) age in the COAST cohort (N=107), the Tucson IIS cohort (N=107), and the Hutterites (N=103). Numbers of subjects are listed on the X axis for each category, and the proportion of MMc positive subjects is shown on the Y axis.

ACCEPTED MANUSCRIPT

Supplemental Table 1. Maternal asthma, sex ratios, and asthma and atopy status of COAST, Tucson IIS, Hutterite, and the combined samples.

|                 |     | COAST         |       |              |          | Tucson IIS    |       |              |          | Hutterites    |       |              |          | Combined Sample |         |               |          |
|-----------------|-----|---------------|-------|--------------|----------|---------------|-------|--------------|----------|---------------|-------|--------------|----------|-----------------|---------|---------------|----------|
|                 |     | Total (%)     | M:F   | MMc+ (%)     | MMc+ M:F | Total (%)     | M:F   | MMc+ (%)     | MMc+ M:F | Total (%)     | M:F   | MMc+ (%)     | MMc+ M:F | Total (%)       | M:F     | MMc+ (%)      | MMc+ M:F |
| Maternal Asthma | Yes | 41/107 (38.3) | 24:17 | 7/41 (17.1)  | 4:3      | 15/107 (14.0) | 3:12  | 6/15 (40.0)  | 1:5      | 48/103 (46.6) | 25:23 | 8/48 (16.7)  | 2:6      | 104/317 (32.8)  | 52:52   | 21/104 (20.2) | 7:14     |
|                 | No  | 66/107 (61.7) | 36:30 | 11/66 (16.7) | 5:6      | 92/107 (85.9) | 47:45 | 23/92 (25.0) | 10:13    | 55/103 (53.4) | 30:25 | 11/55 (20.0) | 7:4      | 213/317 (67.2)  | 113:100 | 45/213 (21.1) | 22:23    |
| Asthma          | Yes | 42/107 (39.3) | 27:15 | 3/42 (7.1)   | 2:1      | 11/107 (10.3) | 6:5   | 2/11 (18.1)  | 0:2      | 36/97 (37.1)  | 19:17 | 5/36 (13.9)  | 3:2      | 89/311 (28.6)   | 54:37   | 10/89 (11.2)  | 5:5      |
|                 | No  | 65/107 (60.7) | 33:32 | 15/65 (23.1) | 7:8      | 96/107 (89.7) | 44:52 | 27/96 (28.1) | 11:16    | 61/97 (62.9)  | 32:29 | 13/61 (21.3) | 5:8      | 222/311 (71.4)  | 107:113 | 55/222 (24.8) | 23:32    |
| Atopy           | Yes | 42/88 (47.7)  | 28:14 | 5/42 (11.9)  | 3:2      | 41/87 (47.1)  | 20:21 | 12/41 (29.3) | 6:6      | 45/78 (57.7)  | 24:21 | 6/45 (13.3)  | 2:4      | 128/253 (50.6)  | 72:56   | 23/128 (18.0) | 11:12    |
|                 | No  | 46/88 (52.3)  | 23:23 | 12/46 (26.1) | 12:12    | 46/87 (52.9)  | 21:25 | 14/46 (30.4) | 5:9      | 33/78 (42.3)  | 16:17 | 6/33 (18.2)  | 2:4      | 125/253 (49.4)  | 60:65   | 32/125 (25.6) | 19:25    |

Supplemental Table 2. Summary of qPCR results in MMc+ subjects. GE = genome equivalents.

| Sample        | MMc Range<br>(GE/million host<br>cells tested) | Mean # (SD) of GE<br>surveyed |                        | Range of total GE<br>surveyed |                        |
|---------------|------------------------------------------------|-------------------------------|------------------------|-------------------------------|------------------------|
|               |                                                | In MMc+<br>subjects           | In the total<br>sample | In MMc+<br>subjects           | In the total<br>sample |
| COAST         | 4.1-925.2                                      | 83,136<br>(23,864)            | 82,723<br>(30,475)     | 41,325-<br>127,165            | 20,513-<br>149,245     |
| Tucson<br>IIS | 0.2-312.0                                      | 89,806<br>(43,862)            | 94,284<br>(34,387)     | 12,453-<br>142,641            | 12,453-<br>148,527     |
| Hutterites    | 1.5-374.7                                      | 74,241<br>(16,636)            | 89,203<br>(27,075)     | 53,999-<br>101,266            | 32,560-<br>131,522     |

Supplemental Table 3. Number of subjects tested for each NIMA and corresponding number of MMc positive subjects per sample.

| NIMA       | COAST    |            | Tucson IIS |            | Hutterites |            | Combined Sample |            |
|------------|----------|------------|------------|------------|------------|------------|-----------------|------------|
|            | # Tested | # Positive | # Tested   | # Positive | # Tested   | # Positive | # Tested        | # Positive |
| DRB1*01    | 8        | 1          | 12         | 1          | 15         | 2          | 35              | 4          |
| DRB1*15/16 | 19       | 4          | 19         | 7          | 9          | 1          | 47              | 10         |
| DRB1*04    | 23       | 3          | 26         | 7          | 24         | 3          | 73              | 13         |
| DRB1*07    | 21       | 3          | 16         | 4          | 9          | 0          | 46              | 7          |
| DRB1*08    | 3        | 0          | 3          | 0          | 2          | 0          | 8               | 0          |
| DRB1*14    | 1        | 0          | 0          | 0          | 1          | 0          | 2               | 0          |
| DQA1*01    | 4        | 1          | 16         | 7          | 4          | 1          | 24              | 9          |
| DQA1*05    | 28       | 5          | 15         | 3          | 39         | 11         | 82              | 20         |
